# Supplementary material for: Highly active and durable flowerlike Pd/Ni(OH)2 catalyst for the electrooxidation of ethanol in alkaline medium
Source: Royal Society of Chemistry journal article supplement (doi:10.1039/c6ra14321k), 2016-01-01
Supplement: c6ra14321k1.pdf [file c6ra14321k1.pdf]

Supporting Information for

Highly active and durable flowerlike Pd/Ni(OH)<sub>2</sub> catalyst for the  
electrooxidation of ethanol in alkaline medium

Jiatai Zhong<sup>a</sup>, Duan Bin<sup>a</sup>, Bo Yan<sup>a</sup>, Yue Feng<sup>a</sup>, Ke Zhang<sup>a</sup>, Jin Wang<sup>a</sup>, Caiqin Wang<sup>a</sup>,  
Yukihide Shiraishi<sup>b</sup>, Ping Yang<sup>a</sup> and Yukou Du<sup>a,b\*</sup>

<sup>a</sup>College of Chemistry, Chemical Engineering and Materials Science, Soochow University, Suzhou 215123, P.R. China. E-mail: [duyk@suda.edu.cn](mailto:duyk@suda.edu.cn)

<sup>b</sup>Tokyo University of Science Yamaguchi SanyoOnoda-shi Yamaguchi 756-0884, Japan

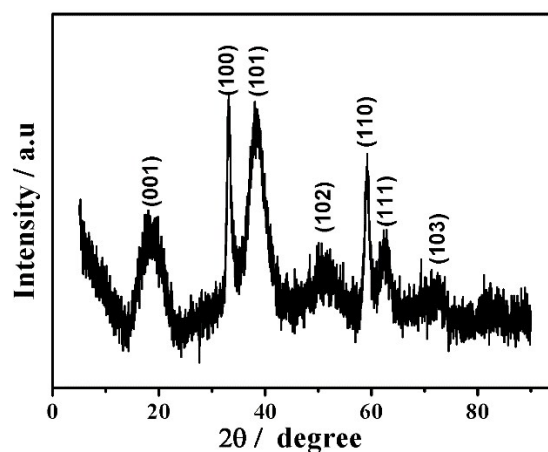

**Figure S1.** XRD patterns of the Ni(OH)<sub>2</sub> catalysts.

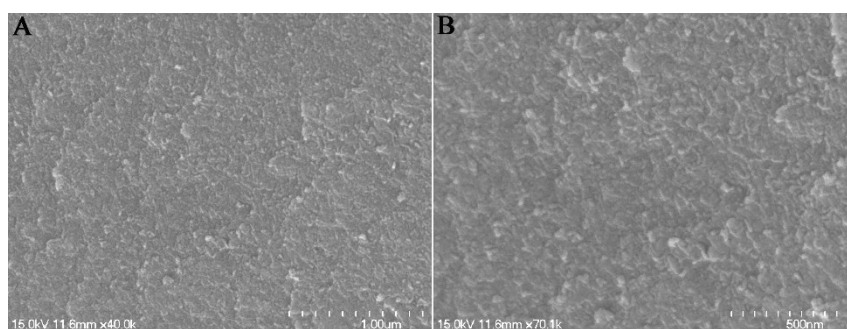

**Figure S2.** SEM images of Ni(OH)<sub>2</sub> with different magnification.

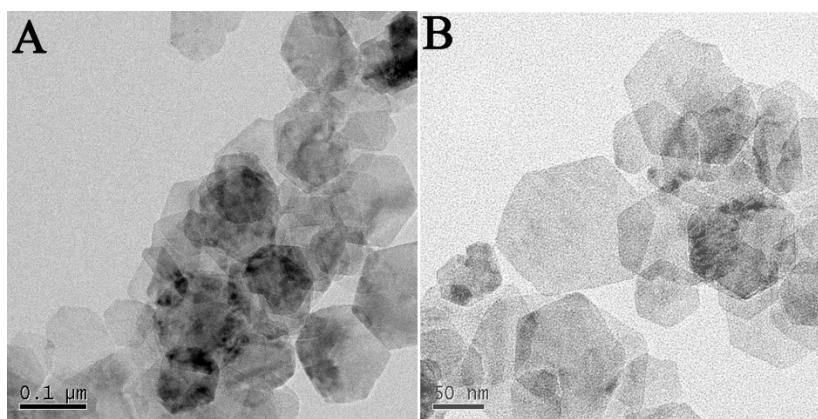

**Figure S3.** TEM images of Pd/Ni(OH)<sub>2</sub> with different magnification.

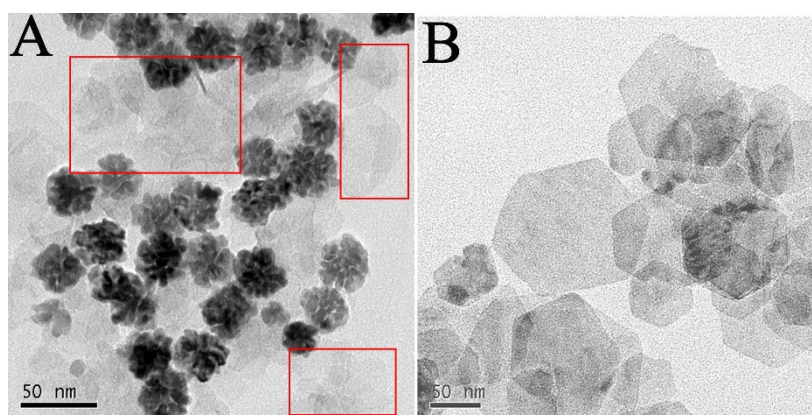

**Figure S4.** TEM images of (A)Pd/Ni(OH)<sub>2</sub> and (B)Ni(OH)<sub>2</sub>.

We have marked Ni(OH)<sub>2</sub> in figure S4(A) captioned as Fig. 4(C) in the original manuscript. Moreover, in figure S4(B), we captured pure Ni(OH)<sub>2</sub> as reference. According to comparison, it proves that the shadows in Figure S4(A) are agreed with Ni(OH)<sub>2</sub> in morphology.

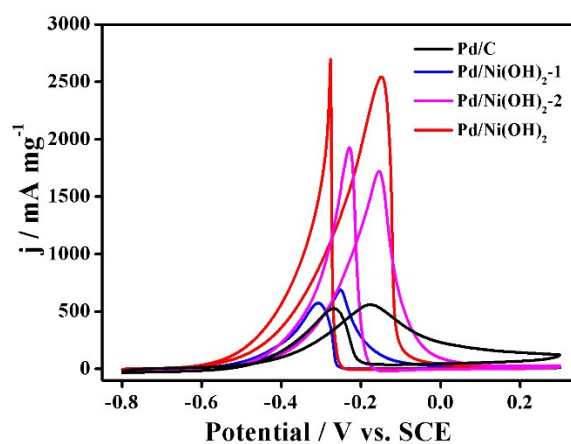

**Figure S5.** CV curves of commercial Pd/C, Pd/Ni(OH)<sub>2</sub>-1, Pd/Ni(OH)<sub>2</sub>-2 and

Pd/Ni(OH)<sub>2</sub> catalysts in solution containing 1 M KOH+1 M C<sub>2</sub>H<sub>5</sub>OH at the scan rate of 50 mV s<sup>-1</sup>.

In order to investigate the effect of the content of Pd in the catalysts on the catalytic performance for ethanol electro-oxidation, the 10 mg, 20 mg and 30 mg of the Ni(NO<sub>3</sub>)<sub>2</sub>·6H<sub>2</sub>O were added into reaction solution, respectively. They are denoted as Pd/Ni(OH)<sub>2</sub>-1(43.0wt% of Pd, 36.2wt% of Ni, the percentage of the catalysts are theoretical value), Pd/Ni(OH)<sub>2</sub>(27.3wt% of Pd, 46.0wt% of Ni) and Pd/Ni(OH)<sub>2</sub>-2(20.1wt% of Pd, 50.5wt% of Ni), respectively. As demonstrated later, the best electrocatalyst for ethanol oxidation reaction is Pd/Ni(OH)<sub>2</sub>, as shown Figure S5.

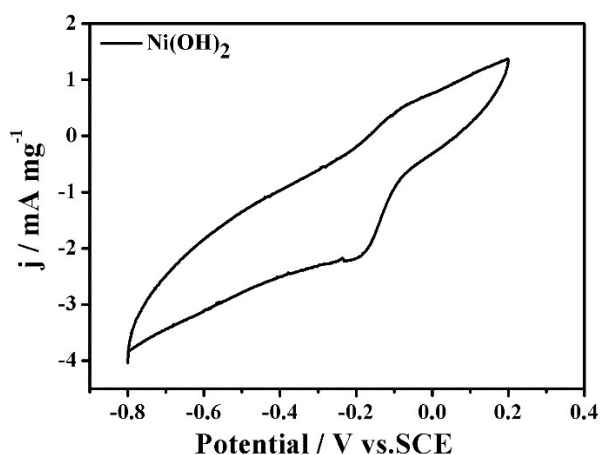

**Figure S6.** CV curves of Ni(OH)<sub>2</sub> catalyst in solution containing 1 M KOH+1 M C<sub>2</sub>H<sub>5</sub>OH at the scan rate of 50 mV s<sup>-1</sup>.

As shown in Figure S6, in the process of the ethanol oxidation, the CV curve does not show the ethanol oxidation peak, indicating that each component of the hybrids fulfills an important specific role, Pd serves as the active sites for ethanol oxidation, Ni(OH)<sub>2</sub> provides abundant OH<sub>ads</sub> species to facilitate the oxidative remove the adsorbed poisoning species (such as CH<sub>3</sub>CO<sub>ads</sub> and CO) on the surface of the Pd layers. As a result of the special surface and synergistic effects, the Pd/Ni(OH)<sub>2</sub> exhibited significantly improved electrocatalytic activity for ethanol electrooxidation.
